# Supplementary material for: Gas chromatography/Fourier transform infrared/mass spectrometry coupling: a tool for Li-ion battery safety field investigation
Source: Royal Society of Chemistry journal article supplement (doi:10.1039/c4ay00054d), 2014-01-01
Supplement: c4ay00054d1.pdf [file c4ay00054d1.pdf]

## SUPPORTING INFORMATION

### A) Coupled techniques complementary information

#### GC conditions

Helium was used as the GC carrier gas and maintained at a constant flow rate of 1.3 mL min<sup>-1</sup>. To achieve good chromatographic peaks resolution, the programmable temperature gradient was optimized from 40 to 250 °C as follows:

**Gas:** the capillary column was ramped from the initial temperature of 40 °C, held for 6 min, increased at 10 °C min<sup>-1</sup> up to 90 °C, increased at 5 °C min<sup>-1</sup> up to 190 °C, held for 5 min, increased at 10 °C min<sup>-1</sup> up to 250 °C where it was held for 10 min. The total duration of GC analysis was 52 min.

**Liquid:** the capillary column was ramped from the initial temperature of 40 °C, held for 5 min, increased at 10 °C min<sup>-1</sup> up to 250 °C where it was held for 10 min. The total duration of GC analysis was 36 min.

The transfer line was maintained at 250 °C. The ion source was set at 200 °C.

#### FTIR conditions

Transfer line temperature and light-pipe temperature were kept constant at 200 °C during the analysis. Real time spectra were recorded by addition of 16 scans, with a spectral resolution of 4 cm<sup>-1</sup> and 32 background scans. The scan range was from 4000 to 650 cm<sup>-1</sup>.

#### MS conditions

Tuning of the mass spectrometer was done automatically using the ions resulting from perfluorotributylamine ionization. The mass spectrometer was operated with a filament current of 250 μA and electron energy of 70 eV in the electron ionization (EI) mode. The mass range was 10-300 u and data acquisition and processing were performed with Xcalibur 2.0.7 software.

### B) Electrochemical cell assembling and lithiation procedures

#### Electrochemical cell assembling procedure

The negative active material is composed of 90 wt. % of SFG6 graphite (TIMCAL - particle size of 6.5 μm (d90) and BET surface area of 17 m<sup>2</sup> g<sup>-1</sup>) and 10 wt% Super P carbon black. The electrolyte composition was 1 M LiPF<sub>6</sub> in ethylene carbonate (EC) and dimethyl

carbonate (DMC) (50/50, w/w) from commercial sources known as LP30<sup>®</sup> (Merck). The Swagelok-type half-cells were assembled in an argon-filled glove-box using 10-15 mg composite powder as working electrode, an electrolyte-impregnated Whatman GF/D borosilicate glass fibre separator and a lithium metal foil.

### **Lithiation procedure**

Once assembled, the cells were subjected to a C/20 galvanostatic discharge (forming LiC<sub>6</sub>) at 20 °C. The cells were cut off at 0.01 V vs. Li<sup>0</sup>/Li<sup>+</sup>.

### **C) Lithiated graphite sample preparation for GC/FTIR/MS analysis**

After disassembling the electrochemical cell inside the argon-filled gloves box, the EC/DMC (1/1 w/w) – LiPF<sub>6</sub> 1M electrolyte-soaked lithiated graphite was introduced into a DSC aluminum crucible. After being sealed, the loaded can was pierced then immediately placed into a laboratory-designed stainless steel cell. This cell was introduced in a furnace heated from room temperature to 200 °C at 10 °C min<sup>-1</sup> then maintained at this temperature for 3h. Then, 0.7 mL of the evolved gases was taken with a syringe equipped with a valve and injected to the GC injector.

### **D) Commercial cell opening and electrolyte sample preparation for liquid GC/MS analysis**

The cell opening was performed in an argon-filled glove box (with < 1 ppm H<sub>2</sub>O, and < 1 ppm O<sub>2</sub>). Care was taken to avoid short-circuits that could induce extra degradation; the tabs were isolated with dielectric tape avoiding contact with the glove-box metallic parts; ceramic cutters and plastic tweezers were used for manipulation. As the cell was “swollen”, the casing edges were cut carefully, not to short-circuit the electrodes. Once the casing was opened, the internal contacts between the current collectors and the tabs were cut. Successively, the anode/separator/cathode assembly was unrolled carefully, the electrodes were removed and a separator sample of approximately 9 cm<sup>2</sup> was introduced in 1 mL of dried acetonitrile (H<sub>2</sub>O < 0.001%). After dilution (1:100) and filtration, 0.1 μL of the solution was injected into the GC.
